# Supplementary material for: The Healthy Eating Plate Advice for Migraine Prevention: An Interventional Study
Source: PubMed Central journal article supplement (PMC7352548; doi:10.3390/nu12061579), 2020-05-28
Supplement: nutrients-12-01579-s001.pdf [file nutrients-12-01579-s001.pdf]

Supplementary table S1.

| <b>Food groups</b>                | <b>Food Items</b>                                                                                                                           |
|-----------------------------------|---------------------------------------------------------------------------------------------------------------------------------------------|
| <i>Fresh fruits</i>               | All kind of fresh fruits                                                                                                                    |
| <i>Vegetables</i>                 | All kind of vegetables (excluding potatoes)                                                                                                 |
| <i>Milk and Dairy</i>             | Milk, Yogurt, Mozzarella                                                                                                                    |
| <i>Whole grain cereals</i>        | Whole grain pasta, whole grain rice, spelt, barley, whole grain bread                                                                       |
| <i>Refined cereals-potatoes</i>   | Refined grain Pasta, Refined grain Rice, Bread                                                                                              |
| <i>High carb breakfast-snacks</i> | Confectionary sweet products, croissants, refined grain biscuits,<br>refined grain breakfast cereals, cakes, French fries, fried rice balls |
| <i>Whole grain breakfast</i>      | Whole grain breakfast cereals, whole-grain biscuits                                                                                         |
| <i>Vegetable oils</i>             | Olive oil, Corn Oil, Seed Oil                                                                                                               |
| <i>Animal fat and margarine</i>   | Butter, lard, margarine                                                                                                                     |
| <i>Cheese</i>                     | Soft cheese and seasoned cheese (goat and cow milk)                                                                                         |
| <i>Egg</i>                        | Egg                                                                                                                                         |
| <i>Legumes</i>                    | Different kind of beans, peas, lentil                                                                                                       |
| <i>White meat</i>                 | Chicken, turkey                                                                                                                             |
| <i>Red and processed meat</i>     | Beef, lamb, pork, sausage, ham, salami, and any processed meat                                                                              |
| <i>Fish</i>                       | Fresh or Frozen fish (or mussel)                                                                                                            |
| <i>Sweetened beverage</i>         | Soft drinks, confectionary juices                                                                                                           |
| <i>Nuts</i>                       | walnuts, chestnuts, peanuts, hazelnuts, pistachio, almonds, seeds                                                                           |
| <i>Alcohol</i>                    | Wine, beer, spirits                                                                                                                         |
